# Supplementary material
Source: PubMed Central journal article supplement (PMC3483422)
Supplement: NIHMS401174-supplement-2.pdf [file NIHMS401174-supplement-2.pdf]

**Supplemental Table S2. CLIP-seq reads mapped to precursor miRNAs and values.** Reads per million (RPM) returned from small-RNA seq for mature miRN binding to the corresponding precursors. Significantly changed miRNAs upon LI highlighted in green (downregulated) and red (upregulated).

| Precursor miRNA | LIN28-V5 CLIP | hES CLIP | Mature miRNA  | LIN28-V5 RPM |
|-----------------|---------------|----------|---------------|--------------|
| let-7a-1        | 18            | 5        | let-7a-5p     | 15,917       |
| let-7a-3        | 19            | 0        | let-7a-5p     | 15,917       |
| let-7b          | 69            | 0        | let-7b-5p     | 148          |
| let-7c          | 22            | 0        | let-7c        | 215          |
| let-7d          | 24            | 0        | let-7d-3p     | 0            |
|                 |               |          | let-7d-5p     | 4            |
| let-7e          | 6             | 0        | let-7e-3p     | 0            |
|                 |               |          | let-7e-5p     | 345          |
| let-7f-1        | 130           | 0        | let-7f-5p     | 808          |
| let-7f-2        | 8             | 0        | let-7f-5p     | 808          |
| let-7g          | 134           | 0        | let-7g-5p     | 103          |
| let-7i          | 69            | 0        | let-7i-5p     | 18           |
| mir-101-2       | 13            | 0        | miR-101-5p    | 0            |
| mir-103-2       | 17            | 0        | miR-103a-2-5p | 0            |
| miR-106b        | 25            | 0        | miR-106b-3p   | 108          |
|                 |               |          | miR-106b-5p   | 168          |
| miR-10a         | 133           | 0        | miR-10a-3p    | 4            |
|                 |               |          | miR-10a-5p    | 131,067      |
| mir-1182        | 8             | 0        | mir-1182-5p   | 0            |
| miR-1226        | 13            | 0        | miR-1226-3p   | 5            |
| miR-1244-1      | 12            | 136      | miR-1244      | 0            |
| miR-1244-2      | 20            | 97       | miR-1244      | 0            |
| miR-1244-3      | 8             | 70       | miR-1244      | 0            |
| miR-1248        | 368           | 5        | miR-1248      | 0            |
| miR-125a        | 80            | 0        | miR-125a-3p   | 5            |
|                 |               |          | miR-125a-5p   | 1,268        |
| miR-1291        | 70            | 0        | miR-1291      | 0            |
| miR-1306        | 7             | 0        | miR-1306-5p   | 5            |
| miR-1307        | 6             | 0        | miR-1307-3p   | 172          |
|                 |               |          | miR-1307-5p   | 149          |
| miR-16-2        | 0             | 7        | miR-16-2-3p   | 2            |
|                 |               |          | miR-16-5p     | 4,749        |
